# Supplementary material for: Toward Sustainable Aquaculture: Microalgae Fully Replace Fishmeal and Fish Oil in Rainbow Trout Diets While Maintaining Growth, Nutritional Quality, and Cost Viability
Source: Research Square preprint supplement (doi:10.21203/rs.3.rs-8642818/v1), 2026-02-10
Supplement: Supplementary file 1 [file 5db7cd848435381f82930c10.docx]

Appendix A

Table A1. Fatty acid profiles of experimental diets.

|  | Diet TFA%a | | | |
| --- | --- | --- | --- | --- |
| Referenceb | NSW75 c | NSW100 d | NSO100e |
| 14:0 | 5.75 ± 0.15 | 1.9 ± 0.05 | 0.89 ± 0.01 | 0.42 ± 0.01 |
| 15:0 | 0.5 ± 0.01 | 0.16 ± 0 | 0.08 ± 0 | 0.06 ± 0 |
| 16:0 | 20.42 ± 0.08 | 12.88 ± 0.06 | 10.71 ± 0.03 | 11.35 ± 0.09 |
| 17:0 | 0.6 ± 0.01 | 0.2 ± 0 | 0.1 ± 0 | 0.1 ± 0 |
| 18:0 | 4.25 ± 0.05 | 2.96 ± 0.03 | 2.57 ± 0.03 | 2.66 ± 0.01 |
| 20:0 | 0.35 ± 0 | 0.49 ± 0.01 | 0.51 ± 0 | 0.53 ± 0.01 |
| 22:0 | 0.24 ± 0 | 0.29 ± 0.01 | 0.3 ± 0 | 0.31 ± 0.01 |
| 24:0 | 0.21 ± 0 | 0.26 ± 0 | 0.26 ± 0.02 | 0.24 ± 0 |
| Total SFAf | 32.39 ± 0.17 | 19.16 ± 0.07 | 15.43 ± 0.08 | 15.67 ± 0.07 |
| 16:1ω9 | 0.18 ± 0.01 | 0.06 ± 0 | 0.04 ± 0 | 0.02 ± 0.01 |
| 16:1ω7 | 9.66 ± 0.1 | 2.32 ± 0.02 | 0.64 ± 0.01 | 0.64 ± 0.01 |
| 18:1ω9 | 13.52 ± 0.13 | 38.17 ± 0.25 | 45.28 ± 0.07 | 44.48 ± 0.2 |
| 18:1ω7 | 3.03 ± 0.03 | 2.54 ± 0.02 | 2.46 ± 0 | 2.46 ± 0.01 |
| 20:1ω9 | 0.75 ± 0.01 | 0.75 ± 0.02 | 0.74 ± 0.01 | 0.74 ± 0.01 |
| 20:1ω7 | 0.13 ± 0 | 0 ± 0 | 0 ± 0 | 0 ± 0 |
| 22:1ω11 | 0.09 ± 0.01 | 0.08 ± 0.02 | 0.06 ± 0 | 0.05 ± 0 |
| 22:1ω9 | 0.21 ± 0 | 0.12 ± 0.02 | 0.09 ± 0.01 | 0.1 ± 0 |
| 24:1ω9 | 0.29 ± 0.02 | 0.42 ± 0.02 | 0.33 ± 0.02 | 0.13 ± 0.01 |
| Total MUFAg | 28.18 ± 0.07 | 44.6 ± 0.26 | 49.69 ± 0.07 | 48.66 ± 0.19 |
| 18:2ω6 | 15.49 ± 0.09 | 21.42 ± 0.07 | 23.91 ± 0.07 | 23.19 ± 0.13 |
| 18:3ω6 | 0.21 ± 0 | 0.06 ± 0 | 0 ± 0 | 0 ± 0 |
| 20:2ω6 | 0.23 ± 0 | 0.13 ± 0.02 | 0.07 ± 0.01 | 0.07 ± 0 |
| 20:3ω6 | 0.18 ± 0 | 0.09 ± 0 | 0.05 ± 0 | 0 ± 0 |
| 20:4ω6 ARAh | 0.79 ± 0.01 | 0.4 ± 0 | 0.25 ± 0 | 0.17 ± 0.02 |
| 22:4ω6 | 0.13 ± 0 | 0.03 ± 0.02 | 0 ± 0 | 0 ± 0 |
| 22:5ω6 | 0.29 ± 0 | 1.47 ± 0.01 | 1.4 ± 0 | 1.18 ± 0.01 |
| Total ω6 PUFAi | 17.32 ± 0.09 | 23.6 ± 0.07 | 25.67 ± 0.06 | 24.62 ± 0.12 |
| 18:3ω3 ALAj | 1.82 ± 0.02 | 3.93 ± 0.03 | 4.84 ± 0.05 | 4.62 ± 0.03 |
| 18:4ω3 | 1.37 ± 0.02 | 0.31 ± 0.01 | 0.02 ± 0.02 | 0 ± 0 |
| 20:3ω3 | 0.13 ± 0 | 0 ± 0 | 0 ± 0 | 0 ± 0 |
| 20:4ω3 | 0.74 ± 0.02 | 0.23 ± 0 | 0.07 ± 0 | 0.07 ± 0 |
| 20:5ω3 EPAk | 7.65 ± 0.02 | 1.96 ± 0.02 | 0.34 ± 0 | 0.24 ± 0 |
| 22:5ω3 | 1.47 ± 0.02 | 0.36 ± 0 | 0 ± 0 | 0 ± 0 |
| 22:6ω3 DHAl | 6 ± 0.04 | 5.23 ± 0.05 | 3.93 ± 0.01 | 6.11 ± 0.05 |
| Total ω3 PUFAm | 19.51 ± 0.07 | 12.11 ± 0.11 | 9.21 ± 0.08 | 11.05 ± 0.08 |
| Total PUFAn | 39.43 ± 0.14 | 36.24 ± 0.2 | 34.88 ± 0.13 | 35.67 ± 0.2 |
| Total ω6 LC PUFAo | 1.62 ± 0.01 | 2.12 ± 0.04 | 1.76 ± 0.01 | 1.42 ± 0.03 |
| Total ω3 LC PUFAp | 16.32 ± 0.08 | 7.86 ± 0.07 | 4.35 ± 0.01 | 6.43 ± 0.05 |
| ω3 / ω6 PUFAq | 1.13 ± 0 | 0.51 ± 0 | 0.36 ± 0 | 0.45 ± 0 |

a Mean ± standard error for 4 replicates per diet.

b Reference: no replacement of fish meal (FM) and fish oil (FO).

cReplacement of 75% FMFO replaced with *N. oculata* and *Schizo.* flake

d Replacement of 100% of FMFO replaced with *N. oculata* and *Schizo.* flake

e Replacement of 100% of FMFO replaced with *N. oculata* and *Schizo.* oil

f Saturated fatty acids (SFA) is the sum of all fatty acids without double bonds.

g Monounsaturated fatty acids (MUFA) is the sum of all fatty acids with a single bond.

h Arachidonic acid (ARA).

i Omega-6 (n-6) Polyunsaturated fatty acids (PUFAs) (sum of all fatty acids with ≥2 double bonds (18:2, 18:3, 20:2, 20:3, 20:4, 22:4, 22:5).

j Alpha-linolenic acid (ALA).

k Eicosapentaenoic acid (EPA).

l Docosahexaenoic acid (DHA).

m Total ω3 PUFA

n Polyunsaturated fatty acids (PUFA) is the sum of all fatty acids with two or more double bonds.

o n-6 long-chain (LC) PUFA (20:2, 20:3, 20:4, 22:4, 22:5).

P n-3 long-chain (LC) PUFA (20:3, 20:4, 20:5, 22:5, 22:6).

q Ratio calculated for total n-3 PUFA: total n-6 PUFA (n-3/n-6).

Table A2. Macrominerals and trace elements of the experimental diets.

|  | Dieta | | | |
| --- | --- | --- | --- | --- |
| Reference b | NSW75 c | NSW100 d | NSO100 e |
| *Macro minerals (%)* | | | |  |
| Phosphorus | 2.57 | 2.16 | 1.31 | 1.49 |
| Calcium | 6.02 | 4.09 | 0.95 | 1.12 |
| Magnesium | 0.3 | 0.34 | 0.31 | 0.35 |
| Potassium | 0.04 | 0.72 | 1.3 | 1.44 |
| Sulfur | 0.66 | 1.26 | 1.79 | 1.97 |
| *Trace elements (mg kg−1)* | | | |  |
| Copper | 0.16 | 0.11 | 0.04 | 0.04 |
| Iron | 0.21 | 0.26 | 0.41 | 0.4 |
| Manganese | 0.05 | 0.04 | 0.03 | 0.03 |
| Seleniumf | ND | ND | ND | ND |
| Zinc | 0.09 | 0.07 | 0.21 | 0.04 |
| Arsenicf | ND | ND | ND | ND |
| Boron | 0.03 | 0.02 | 0.01 | 0.01 |
| Aluminum | 0.08 | 0.13 | 0.24 | 0.17 |
| Mercury | 0.01 | 0.01 | 0.01 | 0.01 |
| Leadf | ND | ND | ND | ND |
| Molybdenumf | ND | ND | ND | ND |

a Mean for two samples per diet.

b Reference: no replacement of fish meal (FM) and fish oil (FO).

c Replacement of 75% FMFO replaced with *N. oculata* and *Schizo.* flake

d Replacement of 100% of FMFO replaced with *N. oculata* and *Schizo.* flake

e Replacement of 100% of FMFO replaced with *N. oculata* and *Schizo.* oil

f Not detectable (ND) (<0.00 mg/kg).

Table A3. Proximate compositions and amino acid profiles of *N. oculata* defatted co-product and *Schizochytrium* sp.

|  | Ingredients | | | | |
| --- | --- | --- | --- | --- | --- |
|  | *N. oculata* | *Schizo WC* | *Schizo Oil (Fat)* | *Fish Meal* | *Fish Oil* |
| *Proximate composition (g/100g as is)* | | | |  |  |
| Crude protein | 49.7 | 1.19 | N/A | 63.81 | N/A |
| Lipid | 4.8 | 54.1 | 10.16 | 11.64 |  |
| Ash | 8.6 | 8.7 | N/A | 19.29 | N/A |
| Fibre | 0.37 | 0.24 | N/A | .44 | N/A |
| Energy, kJ g-1 | 0.13 | 1.77 | N/A | 323.8 | N/A |
| *Essential amino acids (g/100g in the weight of ingredient as is)* | | | | | |
| Arginine | 2.6 | 0.08 | N/A | 0.457 | N/A |
| Lysine | 2.7 | 0.05 | N/A | 0.503 | N/A |
| Isoleucine | 2.1 | 0.04 | N/A | 0.212 | N/A |
| Leucine | 4.2 | 0.07 | N/A | 0.378 | N/A |
| Histidine | 0.9 | 0.03 | N/A | 0.137 | N/A |
| Methionine | 1.0 | 0.12 | N/A | 0.132 | N/A |
| Phenylalanine | 2.43 | 0.04 | N/A | 0.237 | N/A |
| Threonine | 2.36 | 0.04 | N/A | 0.273 | N/A |
| Tryptophan | 0.45 | 0.02 | N/A | 0.023 | N/A |
| Valine | 2.9 | 0.06 | N/A | 0.272 | N/A |
| Fatty acids fractions % TFA) | |  |  |  |  |
| Total SFA | *287* | 9.2 | 28.94 | 27.44 | 6.6 |
| Total MUFA | *343* | 1.7 | 0.65 | 54.14 | 23.9 |
| Total PUFA | *371* | 63.7 | 70.41 | 19.65 | 40.6 |
| 20:5n-3 EPA | *280* | 0.8 | 0.43 | 1.95 | 14.9 |
| 22:6n-3 DHA | *ND* | 43.2 | 57.90 | 3.03 | 13 |
| Total n-3 PUFA | *280* | 45.9 | 59.40 | 1.95 | 36.3 |
| Total n-6 PUFA | *87* | 17.8 | 11.01 | 3.03 | 4.3 |

Table A4. Total fatty acid profile by percentage of *N. oculata* defatted biomass, *Schizochytrium* sp. whole cells, and *Schizochytrium* DHA oil

|  | *Fatty acid (TFA %)* | | |
| --- | --- | --- | --- |
| *N. oculata*  defatted biomass | *Schizochytrium* sp.  whole cells | Schizochytrium sp. oil |
| 14:0 | 5.09 | 9.3 | 2.12 |
| 15:0 | 0.31 | 0.5 | 0.16 |
| 16:0 | 21.31 | 24.4 | 25.52 |
| 17:0 | 0.15 | NDa | 0.06 |
| 18:0 | 0.44 | 0.5 | 0.85 |
| 20:0 | 0.13 | 0.1 | 0.13 |
| 22:0 | ND | 0.1 | 0.03 |
| 24:0 | ND | ND | 0.00 |
| Total SFAb | 28.53 | 9.2 | 28.94 |
| 16:1ω9 | 6.32 | ND | 0.00 |
| 16:1ω7 | 23.53 | 0.2 | 0.24 |
| 18:1ω9 | 3.28 | 0.1 | 0.08 |
| 18:1ω7 | 0.83 | ND | 0.33 |
| 20:1ω9 | ND | ND | 0.00 |
| 20:1ω7 | ND | ND | 0.00 |
| 22:1ω11 | ND | ND | 0.00 |
| 22:1ω9 | ND | ND | 0.00 |
| 24:1ω9 | ND | 1.4 | 0.00 |
| Total MUFAc | 34.34 | 1.7 | 0.65 |
| 18:2ω6 | 2.02 | ND | 0.12 |
| 18:3ω6 | 0.46 | 0.2 | 0.05 |
| 20:2ω6 | ND | ND | 0.00 |
| 20:3ω6 | 0.40 | 0.4 | 0.13 |
| 20:4ω6 ARAd | 5.82 | 1.4 | 0.00 |
| 22:4ω6 | ND | .1 | 0.00 |
| 22:5ω6 | ND | 15.8 | 10.72 |
| Total ω6 PUFAe | 8.71 | 17.8 | 11.01 |
| 18:3ω3 ALAf | 0.08 | ND | 0.16 |
| 18:4ω3 | 0.00 | 0.6 | 0.19 |
| 20:3ω3 | ND | 0.1 | 0.00 |
| 20:4ω3 | ND | 0.8 | 0.63 |
| 20:5ω3 EPAg | 27.94 | 08 | 0.43 |
| 22:5ω3 | ND | 0.4 | 0.09 |
| 22:6ω3 DHAh | ND | 43.2 | 57.90 |
| Total ω3 PUFAi | 28.03 | 45.9 | 59.40 |
| Total PUFAj | 37.13 | 63.7 | 70.41 |
| Total ω6 LC PUFAk | 6.22 | 17.6 | 10.84 |
| Total ω3 LC PUFAl | 27.94 | 45.3 | 59.05 |
| ω3 / ω6 PUFAm | 3.22 | 2.58 | 5.39 |

a Not detectable (ND) (<0.000 ug/g).

b Saturated fatty acids (SFA) is the sum of all fatty acids without double bonds.

c Monounsaturated fatty acids (MFA) is the sum of all fatty acids with a single bond.

d Arachidonic acid (ARA).

e Omega-6 (n-6) Polyunsaturated fatty acids (PUFAs) (sum of all fatty acids with ≥2 double bonds (18:2, 18:3, 20:2, 20:3, 20:4, 22:4, 22:5).

f Alpha linolenic acid (ALA).

g Eicosapentaenoic acid (EPA).

h Docosahexaenoic acid (DHA).

i Omega-3 (n-3) PUFA (18:3, 18:4, 20:3, 20:4, 20:5, 22:5, 22:6).

j Polyunsaturated fatty acids (PUFA) is the sum of all fatty acids with ≥2 double bonds.

k n-6 long-chain (LC) PUFA (20:2, 20:3, 20:4, 22:4, 22:5).

l n-3 long-chain (LC) PUFA (20:3, 20:4, 20:5, 22:5, 22:6).

m Ratio calculated for total n-3 PUFA: total n-6 PUFA (n-3/n-6).

Table A5. Macromineral and trace element composition of *N. oculata* defatted biomass and *Schizochytrium* sp. whole cells, and *Schizochytrium* sp. oil

|  | *N. oculata* defatted biomass | *Schizochytrium* sp. whole cells | *Schizochytrium* sp. oil |
| --- | --- | --- | --- |
| *Macro minerals (%)* | | |  |
| Phosphorus | 1.4 ± 0.0 | 8.44 | 0.03 |
| Calcium | 0.8 ± 0.0 | 1.03 | NDa |
| Magnesium | 0.6 ± 0.0 | 5.77 | ND |
| Potassium | 1.0 ± 0.0 | 1.13 | 0.19 |
| Sulfur | 0.5 ± 0.0 | 21.63 | 0.37 |
| *Trace elements (mg kg−1)* | |  |  |
| Copper | 61.0 ± 3.0 | 2.75 | ND |
| Iron | 659.8 ± 14.9 | 10.32 | 0.12 |
| Manganese | 91.6 ± 2.2 | 4.4 | ND |
| Selenium | 1.0 ± 0.0 | NDa | ND |
| Zinc | 47.0 ± 1.8 | 3.85 | ND |
| Arsenic | 1.0 ± 0.0 | 3.22 | ND |
| Boron | 468.5 ± 53.7 | BDLb | ND |
| Aluminum | 0.4 ± 0.1 | 0.11 | ND |
| Mercury | 0.2 ± 0.0 | 0.03 | 0.02 |
| Lead | ND | ND | 0.02 |
| Molybdenum | 1.1 ± 0.1 | ND | ND |

a Not detectable (ND) (<0.000 ug/g).

Table A6. Experimental ingredient market prices obtained from Cruz Aquafeed Sustainability Tool (CAST).

| Ingredient | Market price a | CAST Source |
| --- | --- | --- |
| Fish meal (n=30) | 1.54 [1.45, 1.63] | Sarker et al. (2020) |
| Fish oil (n=30) | 1.68 [1.64, 1.76] | Sarker et al. (2020) |
| Canola oil | 0.88 [0.86, 0.92] | Sarker et al. (2020) |
| Co-product meal (raw) | 0.44 [0.40, 0.49] | Sarker et al. (2020) |
| Blood meal (n=9) b | 0.85 [0.73, 0.93] | USDA (2022a) |
| Microalgae whole cells | 2.38 [1.93, 2.57] | Sarker et al. (2020) |
| Microalgae oil | 4.41 [3.57, 4.76] | Sarker et al. (2020) |
| Feather meal (n=92) c | 0.51 [0.46, 0.53] | USDA (2022b) |
| Corn gluten meal (n=30) | 0.62 [0.59, 0.66] | Sarker et al. (2020) |
| Soy protein concentrate (n=10) e | 1.30 [1.00, 3.00] | Alibaba (2022) |
| Wheat gluten meal (n=10) f | 1.60 [1.28, 2.41] | Alibaba (2022) |

a Median [and 95% confidence interval] calculated from bootstrap analysis.

b Ruminant blood meal or pork blood meal.

c Custom report (2010-2019): "Livestock", "Feedstuffs".

e Search term: “soy protein concentrate, feed”.

f Search term: “wheat gluten meal, feed”.

###

Table A7. Digestibility of crude protein between experimental diets.

|  | Apparent Digestibility Coefficientab | | | | ANOVA | |
| --- | --- | --- | --- | --- | --- | --- |
| Nutrient | Referencec | NSW75d | NSW100e | NSO100f | F-value | P-value |
| Crude protein | 97.57 ± 0.28g | 98.07 ± 0.16g | 99.18 ± 0.04h | 98.94 ± 0.12h | 18.998 | <.001 |

a Mean ± standard error for 4 replicates per diet.

b Apparent digestibility coefficient (ADC) = ADC = ( 1 - ((%Pfeces / %P feed ) / (%Y2O3 feed / %Y2O3 feces))) * 100)

c Reference: no replacement of fish meal (FM) and fish oil (FO).

d Replacement of 75% FMFO replaced with *N. oculata* and *Schizo.* flake

e Replacement of 100% of FMFO replaced with *N. oculata* and *Schizo.* flake

f Replacement of 100% of FMFO replaced with *N. oculata* and *Schizo.* oil

g h Mean values not sharing a superscript letter in the same row differ significantly (P < 0.05) from Tukey’s HSD test.

Table A8. Amounts of lipid and major omega-3 (n-3) and n-6 polyunsaturated fatty acid (PUFA) of rainbow trout fed experimental diets for 84 days

| Fatty Acid (% TFA) | Whole Body PUFAa | | | | ANOVA | |
| --- | --- | --- | --- | --- | --- | --- |
| Referenceb | NSW75c | NSW100d | NSO100e | *F* Value | *P* Value |
| 18:2n-6 LA f | 4.19 ± 1.28 | 4.89 ± 0.72 | 5.13 ± 0.4 | 7.43 ± 1.47 | 1.76 | 0.208 |
| 20:4n-6 ARA g | 0.11 ± 0.05 | 0.14 ± 0.02 | 0.13 ± 0.01 | 0.14 ± 0.01 | 0.256 | 0.855 |
| 18:3n-3 ALA h | 0.23 ± 0.1 | 0.24 ± 0.05 | 0.22 ± 0.04 | 0.49 ± 0.14 | 2.1 | 0.154 |
| 20:5n-3 EPA i | 0.38 ± 0.11k | 0.07 ± 0.01l | 0 ± 0l | 0.02 ± 0.02l | 8.767 | 0.002 |
| 22:6n-3 DHA j | 0.91 ± 0.2 | 0.58 ± 0.04 | 0.55 ± 0.02 | 0.79 ± 0.06 | 2.644 | 0.097 |

a Mean ± standard error for 4 replicates per diet.

b Reference: no replacement of fish meal (FM) and fish oil (FO).

c Replacement of 75% FMFO replaced with *N. oculata* and *Schizo.* flake

d Replacement of 100% of FMFO replaced with *N. oculata* and *Schizo.* flake

e Replacement of 100% of FMFO replaced with *N. oculata* and *Schizo.* oil

f Linoleic Acid (LA).

g Arachidonic acid (ARA).

h Alpha linolenic acid (ALA).

i Eicosapentaenoic acid (EPA).

j Docosahexaenoic acid (DHA).

k l Mean values across the row not sharing a common superscript were significantly different as determined by Tukey’s HSD test, P<0.05.
